# Supplementary material
Source: PubMed Central journal article supplement (PMC3035072)

**Table S1. Multivariate analysis final model of patients under 60 year old (n = 174 )**

| <b><u>Variable</u></b> | <b><u>Beta</u></b> | <b><u>Standard error</u></b> | <b><u>t</u></b> | <b><u>Exponent beta</u></b> | <b><u>Wald - statistic</u></b> | <b><u>P</u></b> |
|------------------------|--------------------|------------------------------|-----------------|-----------------------------|--------------------------------|-----------------|
| <b>ARC</b>             | -0.317             | 0.140                        | -2.273          | 0.728                       | 5.165                          | 0.02306         |
| <b>Age.at.Dx</b>       | 0.040              | 0.011                        | 3.560           | 1.041                       | 12.670                         | 0.00037         |
| <b>CytoGrp#</b>        | -0.861             | 0.182                        | -4.731          | 0.423                       | 22.386                         | 0.00000         |
| <b>FLT3Mutant</b>      | 0.535              | 0.247                        | 2.165           | 1.707                       | 4.687                          | 0.03040         |
| <b>WBC</b>             | 0.005              | 0.002                        | 2.689           | 1.005                       | 7.233                          | 0.00716         |
| <b>Albumin</b>         | -0.299             | 0.129                        | -2.309          | 0.742                       | 5.332                          | 0.02095         |

Figure S1. Martingale residual plot of ARC levels

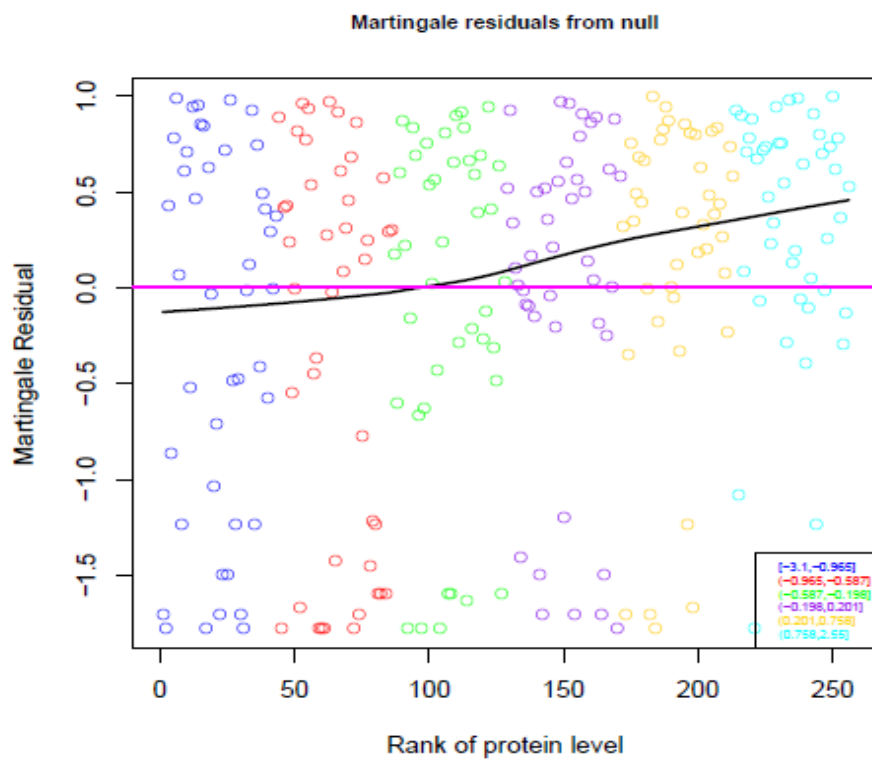

**Figure S2. ARC expression and clinical outcome of AML patients with intermediate cytogenetics.** (A) ARC level and overall survival ( $P = 0.014$ ). (B) ARC level and remission duration ( $P = 0.015$ ).

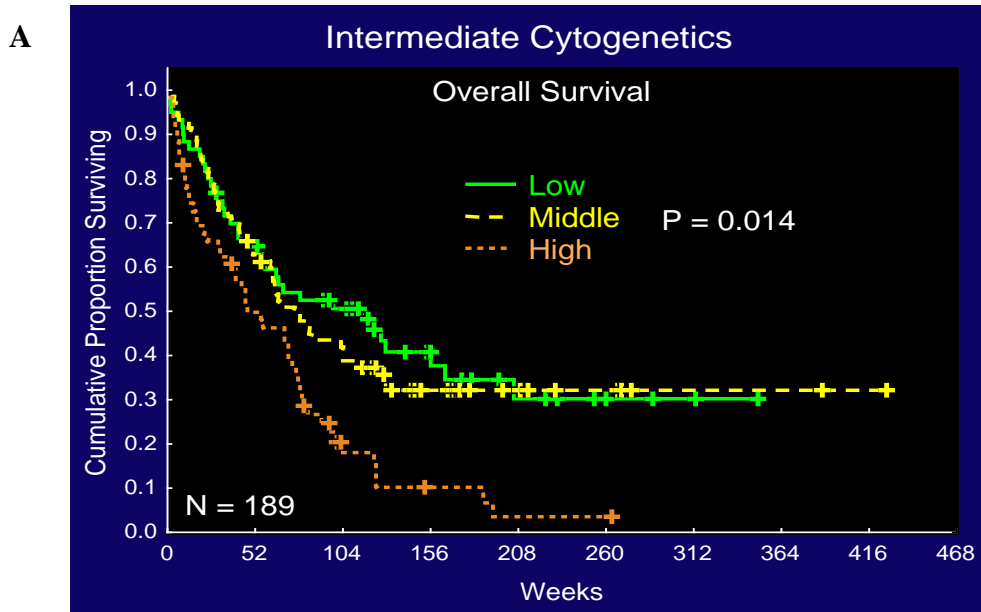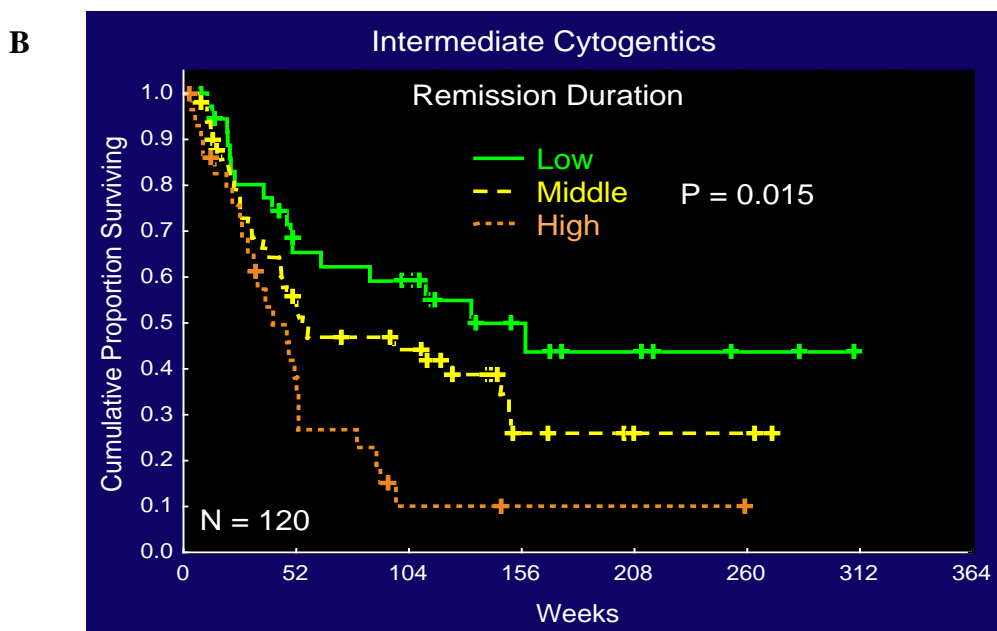

**Figure S3. ARC expression and clinical outcome of AML patients with normal cytogenetics.**

(A) ARC level and overall survival ( $P = 0.03$ ). (B) ARC level and overall survival of AML patients with normal cytogenetics and NPM1 mutation ( $P = 0.0015$ ), and (C) ARC level and overall survival of AML patients with normal cytogenetics and wild type NPM1 ( $P = 0.36$ ).

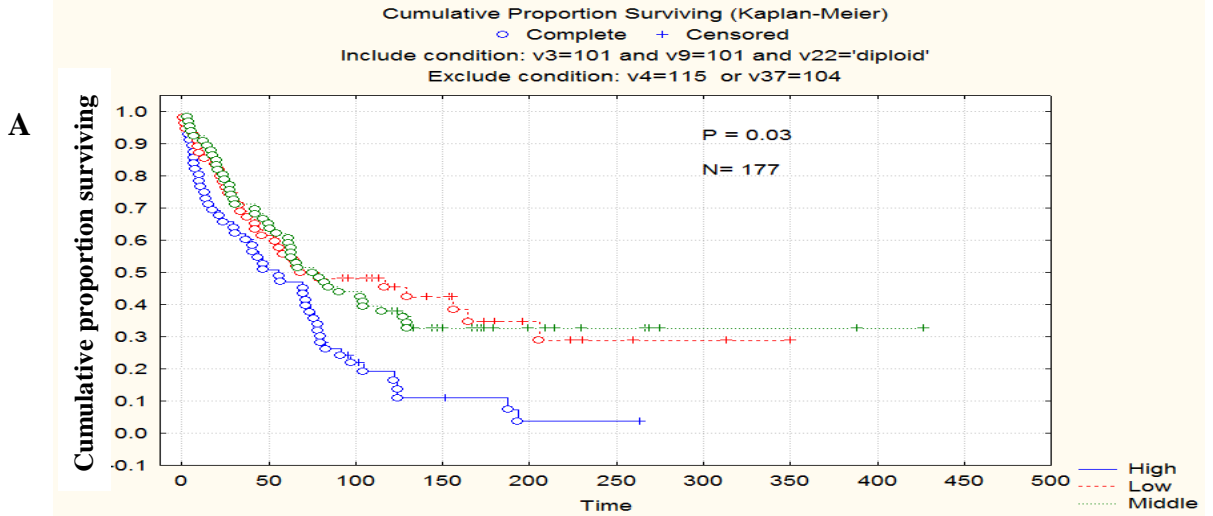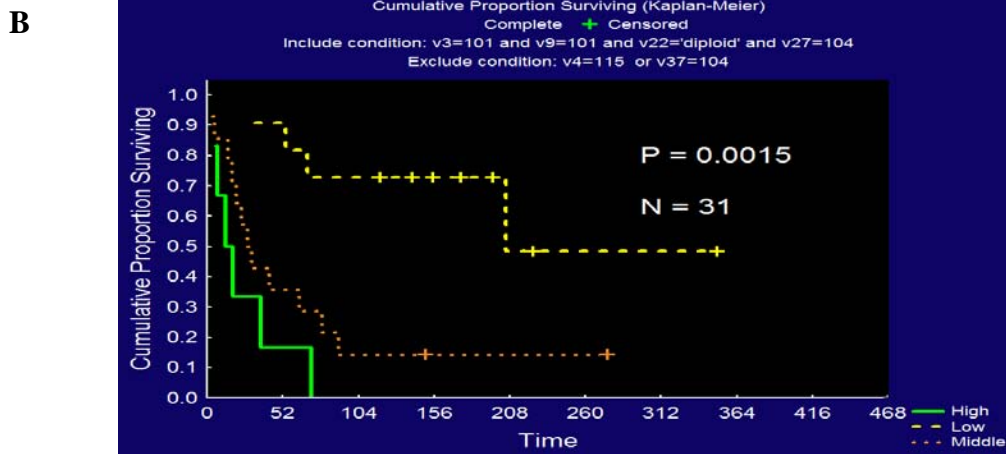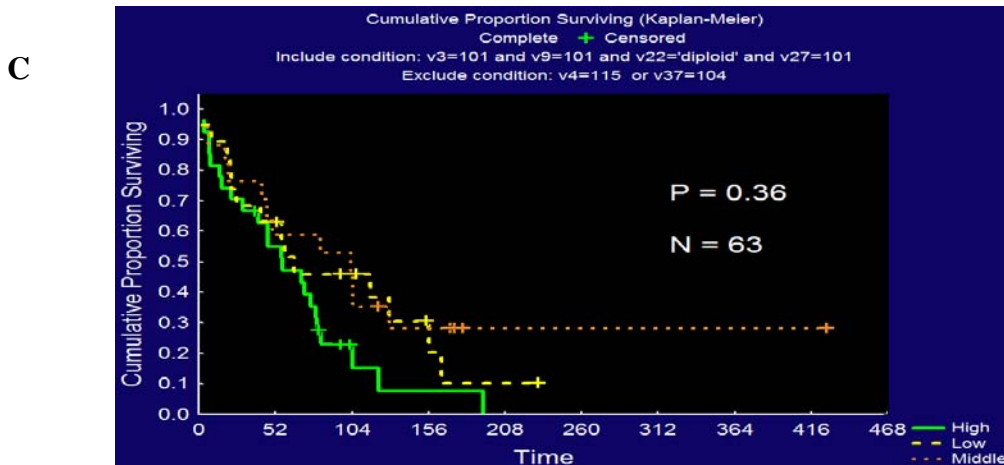

**Figure S4. ARC expression and clinical outcome of AML patients with or without *NPM1* mutations in all cytogenetic groups.** (A) ARC level and overall survival of AML patients with *NPM1* mutation ( $P = 0.003$ ). (B) ARC level and overall survival of AML patients with wild type *NPM1* ( $P = 0.12$ ).

**A**

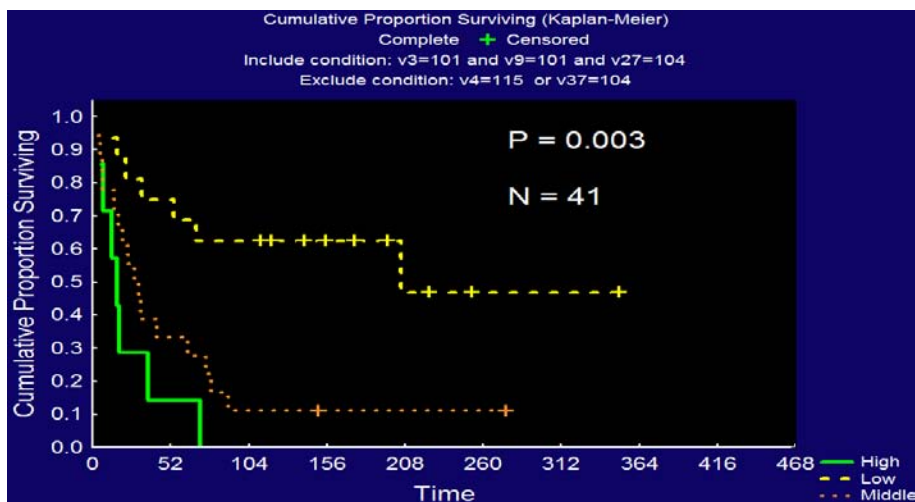

**B**

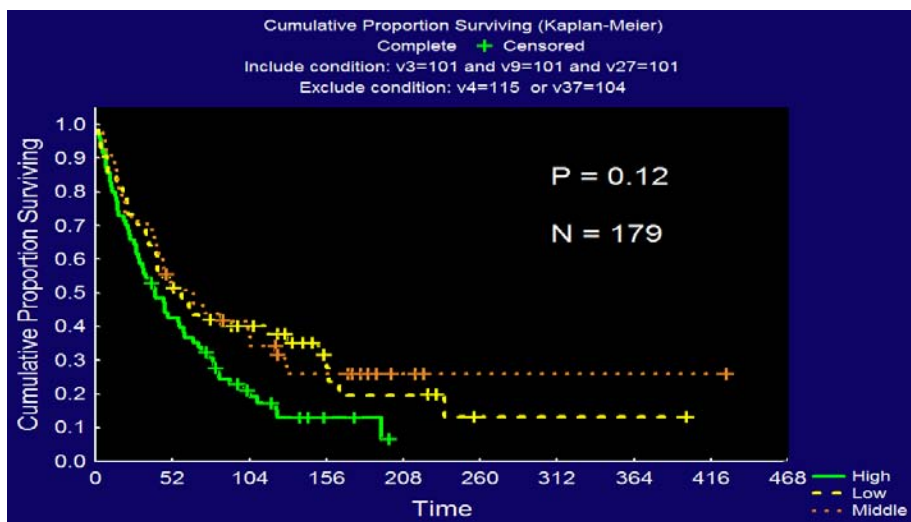

**Figure S5. ARC expression and clinical outcome of adult AML patients under 60 years old with normal karyotype. ARC level and overall survival ( $P = 0.010$ ).**

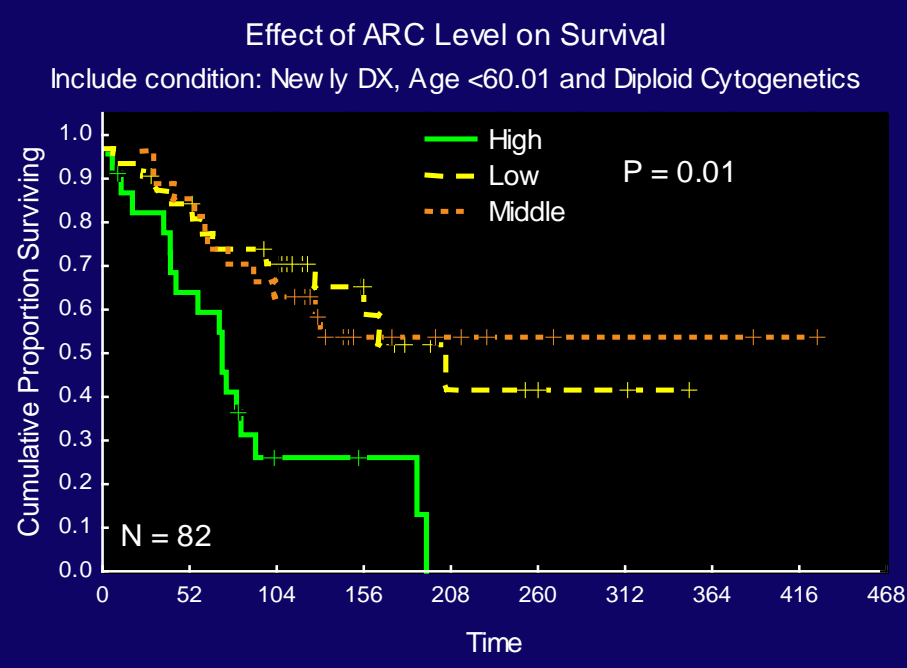

**Figure S6. ARC expression and clinical outcome of AML patients treated with antracycline + HDAC ( $P = 0.04$ ).**

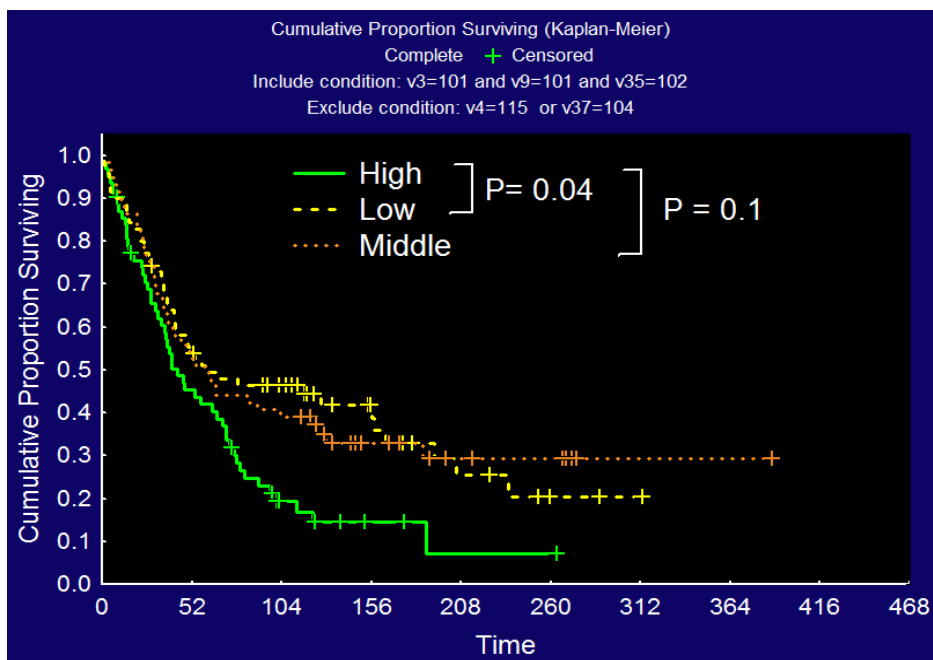

Supplement: blood-2010-04-280503_1.pdf [file blood-2010-04-280503_1.pdf]
